# Supplementary material for: Evolutionary Trend Analysis of Research on 5-ALA Delivery and Theranostic Applications Based on a Scientometrics Study
Source: MDPI journal article supplement (doi:10.3390/pharmaceutics14071477), 2022-07-15
Supplement: s1 [file s1]

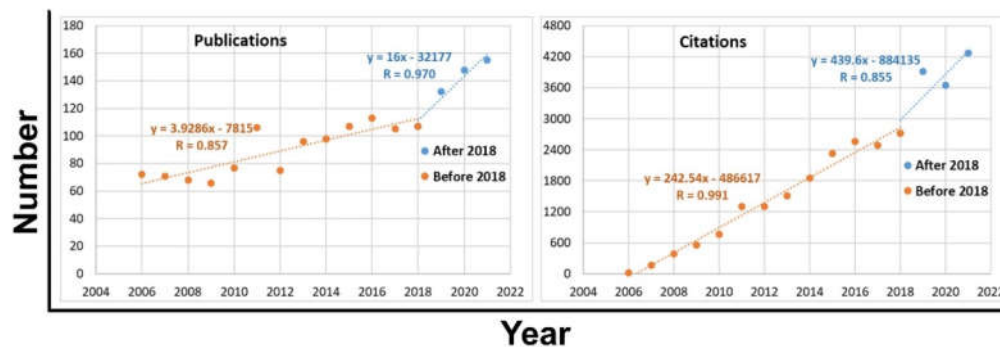

**Supplementary Figure S1.** The linear regression model before and after 2018 in publication/citation terms. Data were processed using EXCEL 2016.

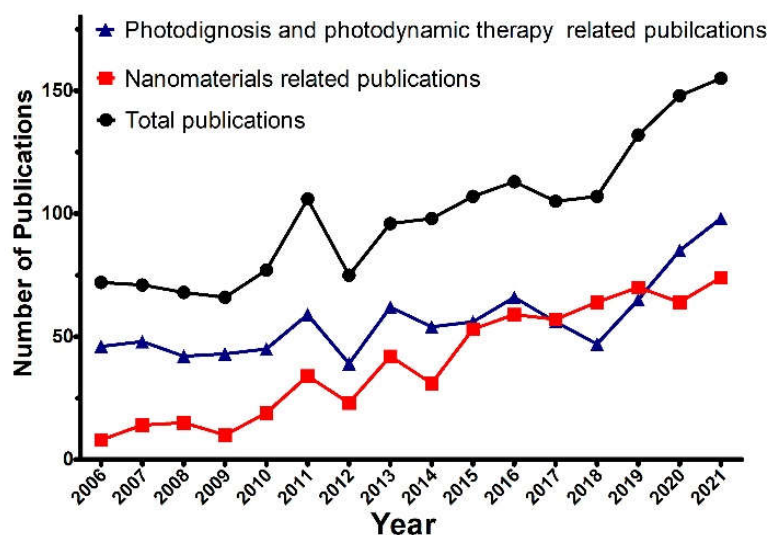

**Supplementary Figure S2.** The publications comparison between nanomaterials related publications and photodiagnosis/photodynamic therapy related publications. Total publications were retrieved with the formula of TI = (\*aminolevulinic acid OR 5 ALA); the nanomaterials related publications were collected in the retrieve formula of TS = (nano\*) AND TI = (\*aminolevulinic acid OR 5 ALA) or TS = (Protoporphyrin ix OR PpIX. the photodiagnosis/photodynamic therapy related publications were achieved in the retrieve formula of TI = (\*aminolevulinic acid OR 5 ALA) AND TS = (photodiagnosis OR photodynamic). All publications were articles only.

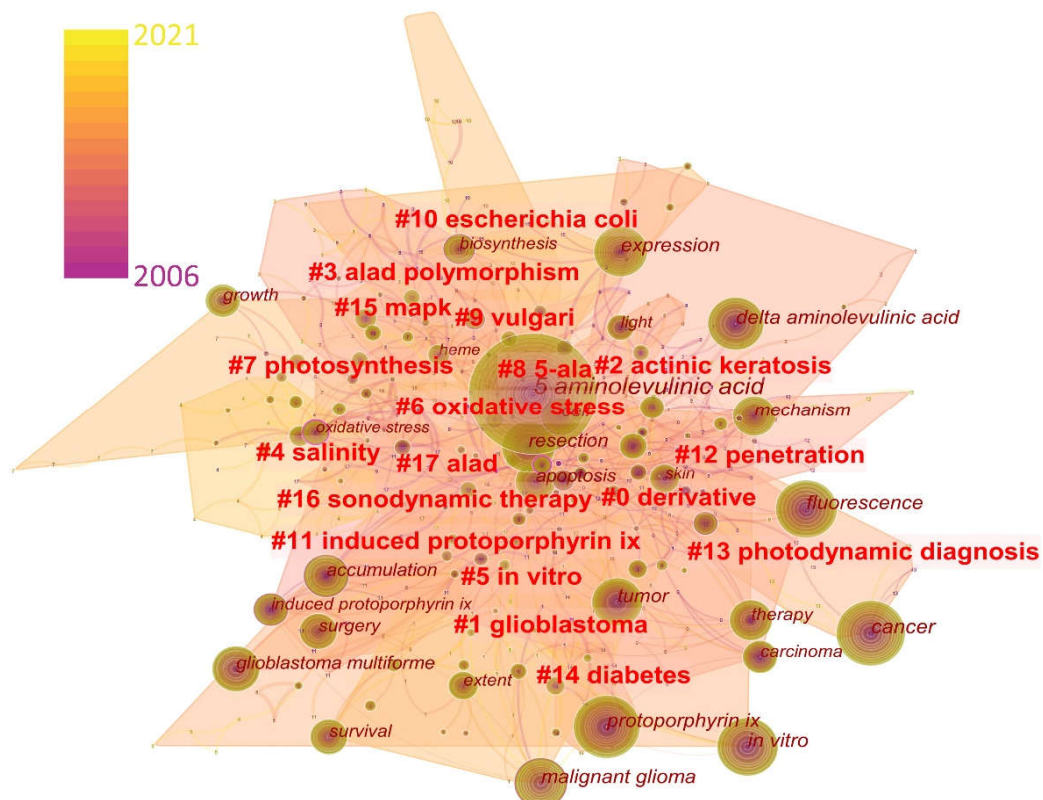

**Supplementary Figure S3.** The second level cluster analysis of keywords after shielding the common keywords associated with photodiagnosis and photodynamic therapy.

**Supplementary Table S1.** The top 10 most active funding agencies in 5-ALA research.

| Funding Agencies                                                       | Publisher's Country | Publication Counts | % of 1595 | ACI   | <i>h</i> -index |
|------------------------------------------------------------------------|---------------------|--------------------|-----------|-------|-----------------|
| National Natural Science Foundation of China                           | China               | 198                | 12.41     | 15.11 | 31              |
| Ministry of Education Culture Sports Science and Technology Japan Mext | Japan               | 118                | 7.40      | 14.03 | 22              |
| National Institutes of Health USA                                      | US                  | 93                 | 5.83      | 25.04 | 29              |
| United States Department of Health Human Services                      | US                  | 93                 | 5.83      | 25.04 | 29              |
| Japan Society for The Promotion of Science                             | Japan               | 69                 | 4.33      | 13.14 | 17              |
| Grants In Aid for Scientific Research Kakenhi                          | Japan               | 47                 | 2.95      | 12.87 | 15              |
| Nih National Cancer Institute                                          | US                  | 37                 | 2.32      | 35.03 | 20              |
| European Commission                                                    | European Union      | 31                 | 1.94      | 18.55 | 14              |
| Fundamental Research Funds for The Central Universities                | China               | 18                 | 1.13      | 16.17 | 10              |
| Nih National Institute of Neurological Disorders Stroke                | US                  | 18                 | 1.13      | 44.28 | 13              |

**Supplementary Table S2.** The top 10 authors with high between centrality in 5-ALA research.

| Rank | Author             | Count | Centrality |
|------|--------------------|-------|------------|
| 1    | Shunichiro Ogura   | 24    | 0.03       |
| 2    | Motowo Nakajima    | 43    | 0.02       |
| 3    | Masahiro Ishizuka  | 26    | 0.02       |
| 4    | Yuichiro Hagiya    | 9     | 0.02       |
| 5    | Tohru Tanaka       | 64    | 0.01       |
| 6    | Kiwamu Takahashi   | 34    | 0.01       |
| 7    | Hlideo Fukuhara    | 17    | 0.01       |
| 8    | Yasutoshi Murayama | 8     | 0.01       |
| 9    | Fuminori Abe       | 7     | 0.01       |
| 10   | Takuya Ishii       | 6     | 0.01       |
